# Supplementary material for: Electronic and Molecular Adsorption Properties of Pt-Doped BC6N: An Ab-Initio Investigation
Source: MDPI journal article supplement (doi:10.3390/nano14090762), 2024-04-26
Supplement: s1 [file s1]

**Supplementary Information (SI)**  
**Electronic and Molecular Adsorption Properties of Pt-doped**  
**BC<sub>6</sub>N: An Ab-initio Investigation**

Nada M. Alghamdi<sup>1</sup>, Mohamed M. Fadlallah<sup>2,\*</sup>,

Hind M. Al-qahtani<sup>3</sup>, and Ahmed A. Maarouf<sup>4,†</sup>

<sup>1</sup> *Department of Physics, College of Science,  
Imam Abdulrahman Bin Faisal University, Dammam 31441, Saudi Arabia*

<sup>2</sup> *Physics Department, Faculty of Science,  
Benha University, Benha 13518, Egypt*

<sup>3</sup> *Department of Physics, College of Science and Humanities,  
Imam Abdulrahman Bin Faisal University, Jubail 3196, Saudi Arabia and*

<sup>4</sup> *Department of Physics, Faculty of Basic Sciences,  
German University in Cairo, New Cairo City 11835, Egypt*

---

\* mohamed.fadlallah@fsc.bu.edu.eg

† ahmed.maarouf@guc.edu.eg

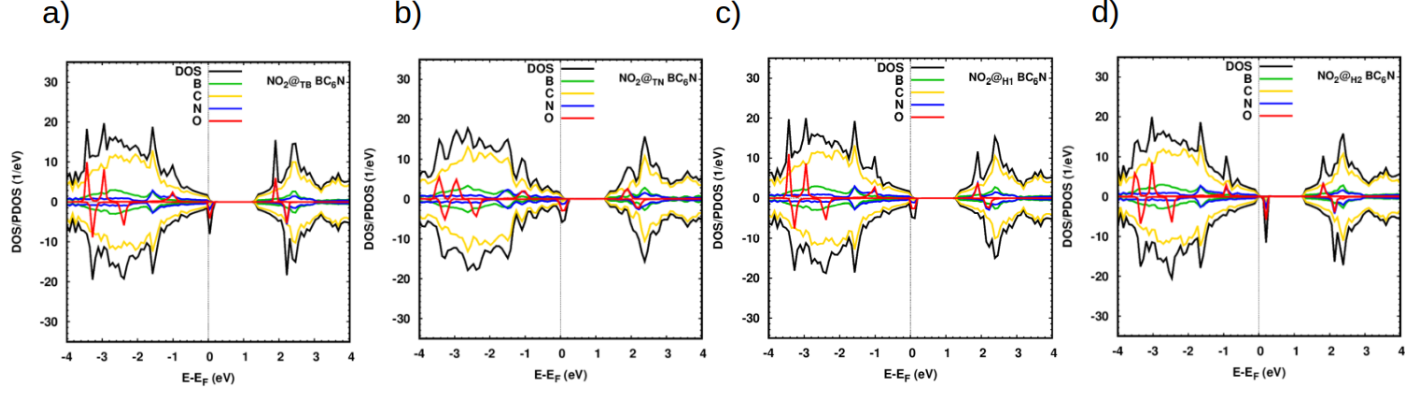

FIG. S 1. DOS/projected DOS (PDOS) of: (a)  $\text{NO}_2@_{\text{TB}}\text{BC}_6\text{N}$ , (b)  $\text{NO}_2@_{\text{TN}}\text{BC}_6\text{N}$ , (c)  $\text{NO}_2@_{\text{H1}}\text{BC}_6\text{N}$  and (d)  $\text{NO}_2@_{\text{H2}}\text{BC}_6\text{N}$ .

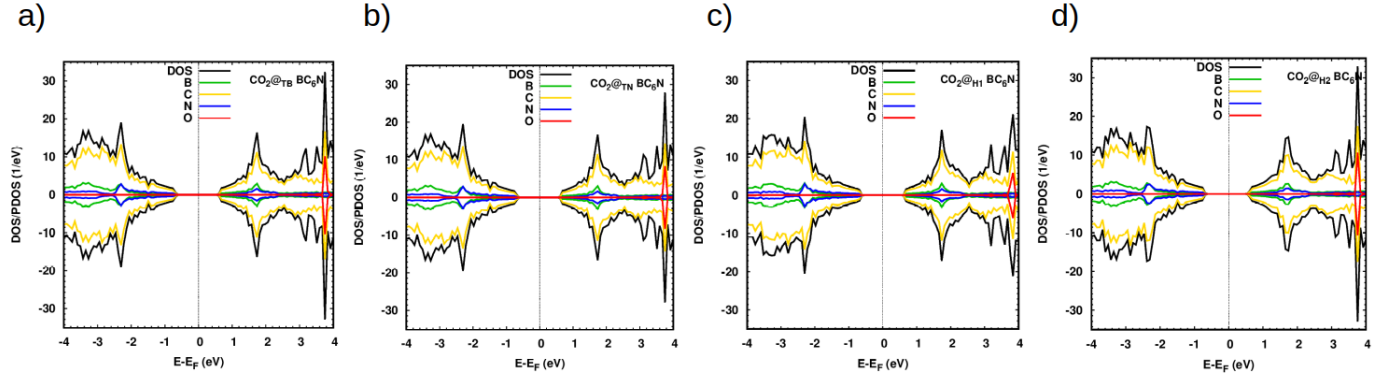

FIG. S 2. DOS/projected DOS (PDOS) of: (a)  $\text{CO}_2@_{\text{TB}}\text{BC}_6\text{N}$ , (b)  $\text{CO}_2@_{\text{TN}}\text{BC}_6\text{N}$ , (c)  $\text{CO}_2@_{\text{H1}}\text{BC}_6\text{N}$  and (d)  $\text{CO}_2@_{\text{H2}}\text{BC}_6\text{N}$ .

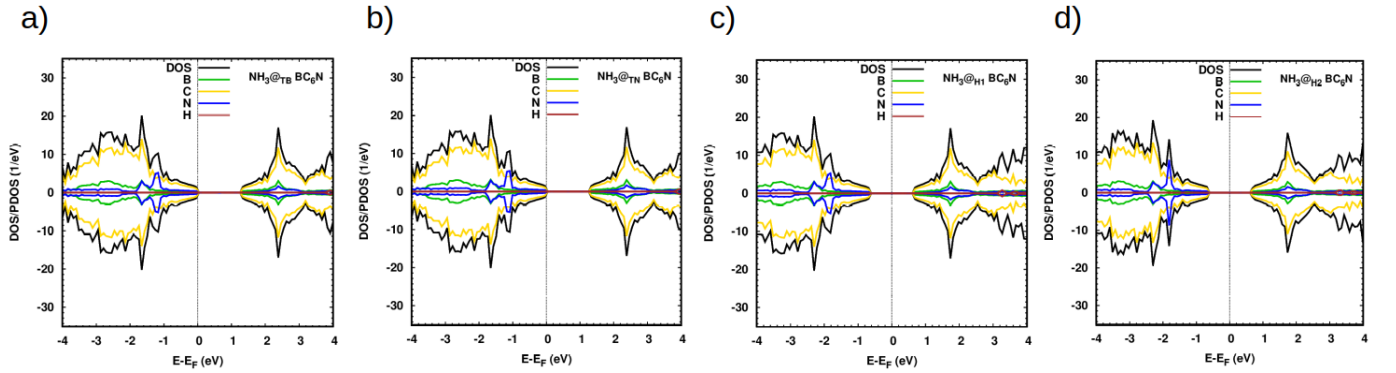

FIG. S 3. DOS/projected DOS (PDOS) of: (a)  $\text{NH}_3@_{\text{TB}}\text{BC}_6\text{N}$ , (b)  $\text{NH}_3@_{\text{TN}}\text{BC}_6\text{N}$ , (c)  $\text{NH}_3@_{\text{H1}}\text{BC}_6\text{N}$  and (d)  $\text{NH}_3@_{\text{H2}}\text{BC}_6\text{N}$ .
